# Supplementary material for: Impact of spatial dispersion, evolution, and selection on Ebola Zaire Virus epidemic waves
Source: PubMed Central journal article supplement (PMC4431419; doi:10.1038/srep10170), 2015-05-14
Supplement: srep10170-s2.pdf [file srep10170-s2.pdf]

# Impact of spatial dispersion, evolution, and selection on Ebola Zaire Virus epidemic waves

Taj Azarian<sup>1,2,†</sup>, Alessandra Lo Presti<sup>3,†</sup>, Marta Giovanetti<sup>3</sup>, Eleonora Cella<sup>3</sup>, Brittany Rife<sup>4</sup>, Alessia Lai<sup>5</sup>,  
Gianguglielmo Zehender<sup>5</sup>, Massimo Ciccozzi<sup>3,6\*</sup>; Marco Salemi<sup>4,2\*</sup>

\*Drs. Ciccozzi and Salemi serve as co-senior authors; Dr. Salemi serves as corresponding author.

†Taj Azarian and Alessandra Lo Presti would like to be recognized as co-first authors

1. College of Public Health and Health Professions and College of Medicine, Department of Epidemiology, University of Florida, Gainesville, FL, USA; 2. Emerging Pathogens Institute, University of Florida, Gainesville, FL, USA; 3. Department of Infectious, Parasitic and Immunomediated Diseases, Istituto Superiore di Sanità, Rome, Italy; 4. Department of Pathology, Immunology and Laboratory Medicine, University of Florida, Gainesville, FL, USA; 5. Department of Biomedical and Clinical Science, Infectious Diseases and Immunopathology Section, 'L. Sacco' Hospital, University of Milan, Milan, Italy; 6. University Hospital Campus Bio-Medico, Italy

## Author Contact

Massimo Ciccozzi  
Viale Regina Elena, 299, 00161 Rome, Italy  
Tel +39-06-49903187  
massimo.ciccozzi@iss.it

#Marco Salemi  
PO Box 103633, Gainesville, FL 32610, USA.  
Tel/Fax +1 352 273 9567/8284  
salemi@pathology.ufl.edu

\*Corresponding Authors: Marco Salemi, Ph.D. - salemi@pathology.ufl.edu, Massimo Ciccozzi -  
massimo.ciccozzi@iss.it

Condensed Title: Phylogeography of Ebola Zaire Virus

**Supplementary Table 1 - List of Ebola virus glycoprotein (GP) sequences by year and location of collection**

| Name  | Year | City/Village | Country                      | Latitude     | Longitude     | Accession  | Source     |
|-------|------|--------------|------------------------------|--------------|---------------|------------|------------|
| 1YA   | 1976 | Yambuku      | Democratic Republic of Congo | 2°49'34.6"N  | 22°13'34.2"E  | AF086833.2 | Human      |
| 2YA   | 1976 | Yambuku      | Democratic Republic of Congo | 2°49'34.6"N  | 22°13'34.2"E  | AF272001.1 | Human      |
| 3YA   | 1976 | Yambuku      | Democratic Republic of Congo | 2°49'34.6"N  | 22°13'34.2"E  | AY142960.1 | Human      |
| 6YA   | 1976 | Yambuku      | Democratic Republic of Congo | 2°49'34.6"N  | 22°13'34.2"E  | EU224440.2 | Human      |
| 27YA  | 1976 | Yambuku      | Democratic Republic of Congo | 2°49'34.6"N  | 22°13'34.2"E  | KC242801.1 | Human      |
| 139YA | 1976 | Yambuku      | Democratic Republic of Congo | 2°49'34.6"N  | 22°13'34.2"E  | U81161.1   | Human      |
| 17YA  | 1977 | Yambuku      | Democratic Republic of Congo | 2°49'34.6"N  | 22°13'34.2"E  | KC242791.1 | Human      |
| 18IV  | 1994 | Ivindo       | Gabon                        | 0°09'24.2"S  | 12°10'22.6"E  | KC242792.1 | Human      |
| 131IV | 1994 | Ivindo       | Gabon                        | 0°09'24.2"S  | 12°10'22.6"E  | U77384.1   | Human      |
| 4KI   | 1995 | Kikwit       | Democratic Republic of Congo | 5°02'00.0"S  | 18°49'00.0"E  | AY354458.1 | Human      |
| 9KI   | 1995 | Kikwit       | Democratic Republic of Congo | 5°02'00.0"S  | 18°49'00.0"E  | JQ352763.1 | Human      |
| 22KI  | 1995 | Kikwit       | Democratic Republic of Congo | 5°02'00.0"S  | 18°49'00.0"E  | KC242796.1 | Human      |
| 25KI  | 1995 | Kikwit       | Democratic Republic of Congo | 5°02'00.0"S  | 18°49'00.0"E  | KC242799.1 | Human      |
| 19IV  | 1996 | Ivindo       | Gabon                        | 0°09'24.2"S  | 12°10'22.6"E  | KC242793.1 | Human      |
| 20IV  | 1996 | Ivindo       | Gabon                        | 0°09'24.2"S  | 12°10'22.6"E  | KC242794.1 | Human      |
| 21IV  | 1996 | Ivindo       | Gabon                        | 0°09'24.2"S  | 12°10'22.6"E  | KC242795.1 | Human      |
| 23IV  | 1996 | Ivindo       | Gabon                        | 0°09'24.2"S  | 12°10'22.6"E  | KC242797.1 | Human      |
| 24IV  | 1996 | Ivindo       | Gabon                        | 0°09'24.2"S  | 12°10'22.6"E  | KC242798.1 | Human      |
| 129IV | 1996 | Ivindo       | Gabon                        | 0°09'24.2"S  | 12°10'22.6"E  | HQ849547.1 | Human      |
| 130BO | 1996 | BoOue        | Gabon                        | 0°05'37.6"S  | 11°56'57.0"E  | AY058898.1 | Human      |
| 134ET | 2001 | Etakangaye   | Gabon                        | 1°01'00.0"N  | 13°58'00.0"E  | AY526100.1 | Human      |
| 135OL | 2001 | Ollaba       | Gabon                        | 0°40'42.2"N  | 14°10'39.3"E  | AY526099.1 | Human      |
| 136ME | 2001 | Mendemba     | Gabon                        | 0°45'23.9"N  | 14°04'43.0"E  | AY526098.1 | Human      |
| 137ME | 2001 | Mendemba     | Gabon                        | 0°45'23.9"N  | 14°04'43.0"E  | AY526105.1 | Human      |
| 138MA | 2001 | Makokou      | Gabon                        | 0°34'00.0"N  | 12°52'00.0"E  | AY526101.1 | Human      |
| 146EK | 2001 | Ekata        | Gabon                        | 0°40'37.4"N  | 14°17'20.5"E  | EU051632.1 | Gorilla    |
| 26IL  | 2002 | Ilembe       | Gabon                        | 29°22'59.3"S | 31°10'16.7"E  | KC242800.1 | Human      |
| 133EN | 2002 | Entsiami     | Republic of Congo            | 00°72'29"N   | 14°13'40"E    | AY526102.1 | Human      |
| 147LO | 2002 | Lossi        | Republic of Congo            | 0°10'57.5"N  | 14°31'09.1"E  | EU051631.1 | Gorilla    |
| 148LO | 2002 | Lossi        | Republic of Congo            | 0°10'57.5"N  | 14°31'09.1"E  | EU051630.1 | Gorilla    |
| 132MV | 2003 | Mvoula       | Cameroon                     | 2°51'07.7"N  | 11°35'09.3"E  | AY526104.1 | Human      |
| 140MB | 2003 | Mbandza      | Republic of Congo            | 1°29'06.32"S | 16°10'37.95"E | EU051635.1 | Human      |
| 145LO | 2003 | Lossi        | Republic of Congo            | 0°10'57.5"N  | 14°31'09.1"E  | EU051633.1 | Chimpanzee |
| 144ET | 2005 | Etoumbi      | Republic of Congo            | 0°01'13.0"N  | 14°53'21.3"E  | EU051634.1 | Human      |
| 8LU   | 2007 | Luebo        | Democratic Republic of Congo | 5°21'00.0"S  | 21°25'00.0"E  | HQ613403.1 | Human      |
| 10LU  | 2007 | Luebo        | Democratic Republic of Congo | 5°21'00.0"S  | 21°25'00.0"E  | KC242784.1 | Human      |

|       |      |             |                              |             |              |            |       |
|-------|------|-------------|------------------------------|-------------|--------------|------------|-------|
| 11LU  | 2007 | Luebo       | Democratic Republic of Congo | 5°21'00.0"S | 21°25'00.0"E | KC242785.1 | Human |
| 12LU  | 2007 | Luebo       | Democratic Republic of Congo | 5°21'00.0"S | 21°25'00.0"E | KC242786.1 | Human |
| 13LU  | 2007 | Luebo       | Democratic Republic of Congo | 5°21'00.0"S | 21°25'00.0"E | KC242787.1 | Human |
| 14LU  | 2007 | Luebo       | Democratic Republic of Congo | 5°21'00.0"S | 21°25'00.0"E | KC242788.1 | Human |
| 15LU  | 2007 | Luebo       | Democratic Republic of Congo | 5°21'00.0"S | 21°25'00.0"E | KC242789.1 | Human |
| 16LU  | 2007 | Luebo       | Democratic Republic of Congo | 5°21'00.0"S | 21°25'00.0"E | KC242790.1 | Human |
| 7LU   | 2008 | Luebo       | Democratic Republic of Congo | 5°21'00.0"S | 21°25'00.0"E | HQ613402.1 | Human |
| 5GU   | 2014 | Gueckedou   | Guinea                       | 8°33'60.0"N | 10°07'59.9"W | KJ660347.1 | Human |
| 28GU  | 2014 | Gueckedou   | Guinea                       | 8°34'00.0"N | 10°07'60.0"W | KJ660348.1 | Human |
| 29KS  | 2014 | Kissidougou | Guinea                       | 9°11'00.1"N | 10°05'60.0"W | KJ660346.1 | Human |
| 30KA  | 2014 | Kailahun    | Sierra Leone                 | 8°16'38.0"N | 10°34'26.0"W | KM233118.1 | Human |
| 41KA  | 2014 | Kailahun    | Sierra Leone                 | 8°16'38.0"N | 10°34'26.0"W | KM233107.1 | Human |
| 52KA  | 2014 | Kailahun    | Sierra Leone                 | 8°16'38.0"N | 10°34'26.0"W | KM233096.1 | Human |
| 63KA  | 2014 | Kailahun    | Sierra Leone                 | 8°16'38.0"N | 10°34'26.0"W | KM233085.1 | Human |
| 74KA  | 2014 | Kailahun    | Sierra Leone                 | 8°16'38.0"N | 10°34'26.0"W | KM233074.1 | Human |
| 85KA  | 2014 | Kailahun    | Sierra Leone                 | 8°16'38.0"N | 10°34'26.0"W | KM233063.1 | Human |
| 96KA  | 2014 | Kailahun    | Sierra Leone                 | 8°16'38.0"N | 10°34'26.0"W | KM233052.1 | Human |
| 107KA | 2014 | Kailahun    | Sierra Leone                 | 8°16'38.0"N | 10°34'26.0"W | KM233041.1 | Human |
| 119KA | 2014 | Kailahun    | Sierra Leone                 | 8°16'38.0"N | 10°34'26.0"W | KM034558.1 | Human |
| 35KA  | 2014 | Kailahun    | Sierra Leone                 | 8°16'38.0"N | 10°34'26.0"W | KM233113.1 | Human |
| 45KA  | 2014 | Kailahun    | Sierra Leone                 | 8°16'38.0"N | 10°34'26.0"W | KM233103.1 | Human |
| 56KA  | 2014 | Kailahun    | Sierra Leone                 | 8°16'38.0"N | 10°34'26.0"W | KM233092.1 | Human |
| 65KA  | 2014 | Kailahun    | Sierra Leone                 | 8°16'38.0"N | 10°34'26.0"W | KM233083.1 | Human |
| 75KA  | 2014 | Kailahun    | Sierra Leone                 | 8°16'38.0"N | 10°34'26.0"W | KM233073.1 | Human |
| 86KA  | 2014 | Kailahun    | Sierra Leone                 | 8°16'38.0"N | 10°34'26.0"W | KM233062.1 | Human |
| 98KA  | 2014 | Kailahun    | Sierra Leone                 | 8°16'38.0"N | 10°34'26.0"W | KM233050.1 | Human |
| 110KA | 2014 | Kailahun    | Sierra Leone                 | 8°16'38.0"N | 10°34'26.0"W | KM233038.1 | Human |
| 125KA | 2014 | Kailahun    | Sierra Leone                 | 8°16'38.0"N | 10°34'26.0"W | KM034552.1 | Human |
| 128KA | 2014 | Kailahun    | Sierra Leone                 | 8°16'38.0"N | 10°34'26.0"W | KM034549.1 | Human |

**Supplementary Table 2. Estimates of average codon-based evolutionary diversity among sequence pairs within groups and codon-based test for diversifying selection.**

| Group <sup>a</sup> | Year    | dN <sup>b</sup> | dS <sup>c</sup> | dN/dS <sup>d</sup> | Z-test <sup>e</sup> |
|--------------------|---------|-----------------|-----------------|--------------------|---------------------|
| I                  | 1976-77 | 1.14 (0.66)     | 0 (0)           | -                  | $p = 0.045$         |
| II                 | 1994-96 | 4.18 (1.18)     | 6.69 (1.65)     | 0.62               | $p = 1$             |
| III                | 2001-03 | 3.33 (1.08)     | 0.81 (0.45)     | 4.12               | $p = 0.31$          |
| IV                 | 2002-05 | 5.48 (1.53)     | 3.76 (1.14)     | 1.46               | $p = 1$             |
| V                  | 2007-08 | 0 (0)           | 0.44 (0.30)     | 0.00               | $p = 1$             |
| VI                 | 2014    | 1.08 (0.48)     | 0.49 (0.33)     | 2.18               | $p = 1$             |

- a.) Grouping of sequences based on epidemic waves inferred from phylogenetic and epidemiological data. Groups correspond to clades labeled on the Bayesian maximum clade credibility phylogeny in Figure 1a.
- b.) The number of nonsynonymous (dN) differences per sequence from averaging over all sequence pairs within groups and standard errors from 1000 bootstrap replicates.
- c.) The number of synonymous (dS) differences per sequence from averaging over all sequence pairs within groups and standard errors from 1000 bootstrap replicates.
- d.) The ratio of nonsynonymous (dN) to synonymous (dS) substitutions among codon pairs within groups.
- e.) Codon-based Z-test for diversifying selection among sequence pairs within groups.
- The probability ( $p$ ) of rejecting the null hypothesis of strict neutrality ( $dN = dS$ ) in favor of the alternative hypothesis ( $dN > dS$ ). Analyses were conducted using the Nei-Gojobori method with variance estimated using 1000 bootstrap replicates

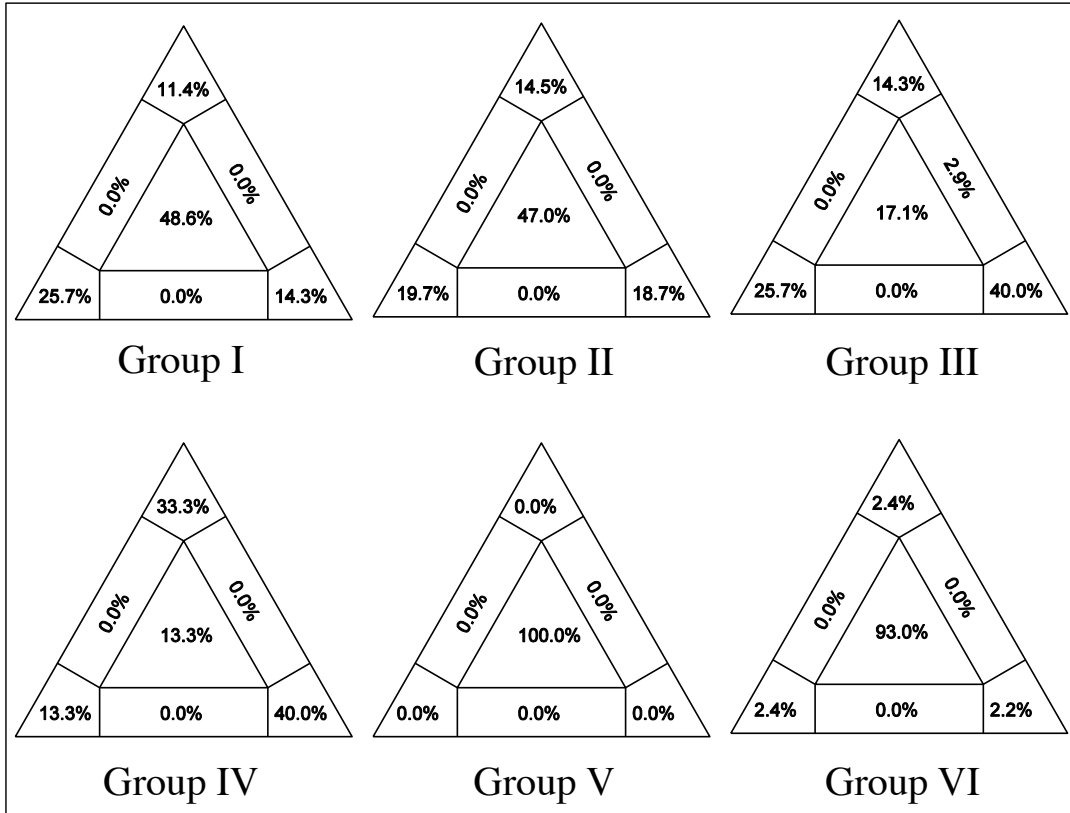

**Supplementary Fig. S1. Likelihood-mapping analysis of groups of discrete epidemics.**

The percentages of likelihoods of the three possible unrooted trees for a set of four sequences (quartets) selected randomly from the data set: dots close to the corners or the sides represent, respectively, tree-like, or network-like phylogenetic signal in the data. The central area of the likelihood map, inside the map, represents star-like signal. The percentage of dots in the central area is given at the basis of each map.

**Supplementary Video 1. Discrete phylogeography of Bayesian maximum clade credibility tree and EBOV outbreak geographic locations.**

Migration events of EBOV epidemic waves visualized using SPREAD v1.0.6 and mapped with ArcGIS v10.1. Migration events with Bayes Factor greater than six are displayed.
